# Supplementary material for: A graphene-printed paper electrode for determination of H2O2 in municipal wastewater during the COVID-19 pandemic
Source: Royal Society of Chemistry journal article supplement (doi:10.1039/d1nj05763d), 2021-12-22
Supplement: d1nj05763d1.pdf [file d1nj05763d1.pdf]

## Supporting Information:

### Graphene-printed paper electrode for determination of H<sub>2</sub>O<sub>2</sub> in municipal wastewater during COVID-19 pandemic

Tushar Kant <sup>a</sup>, Kamlesh Shrivastava <sup>a\*</sup>, Indrapal Karbhal <sup>a</sup>, Monsiha <sup>a</sup>, Sanjay Yadav <sup>a</sup>, , Tikeshwari <sup>a</sup>,  
Sushama Sahu <sup>a</sup>, Yugal Kishor Mahipal <sup>b</sup>, and Vellaichamy Ganesan <sup>c</sup>

<sup>a</sup>School of Studies in Chemistry, Pt. Ravishankar Shukla University, Raipur-492010 (CG), India

<sup>b</sup>School of Studies in Physics and Astrophysics, Pt. Ravishankar Shukla University, Raipur-  
492010 (CG), India

<sup>c</sup>Department of Chemistry, Institute of Science, Banaras Hindu University, Varanasi-221005,  
(UP), India

**\*Corresponding author:**

**Email: kshrivas@gmail.com**

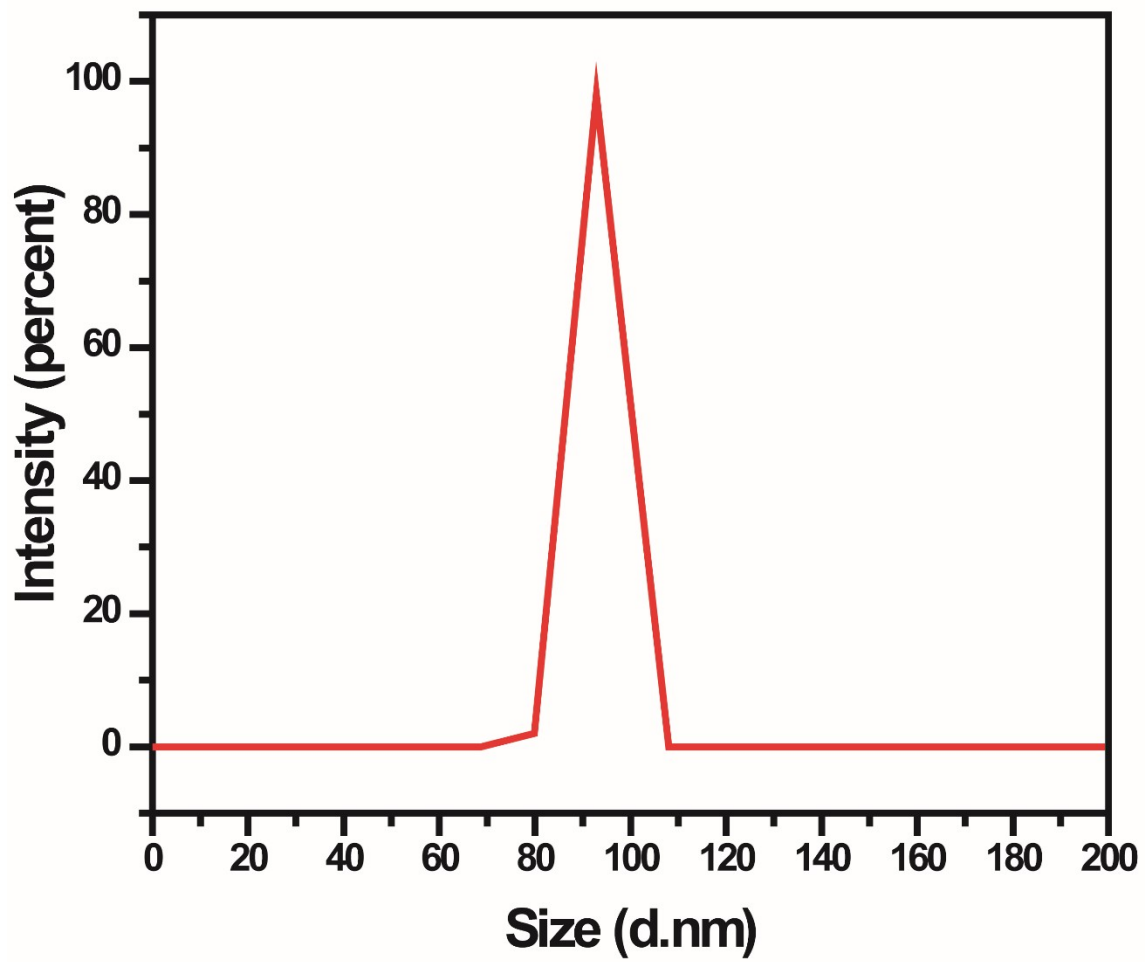

**Fig. S1.** DLS spectra of graphene ethyl cellulose composite nano ink.

Tushar Kant 28-7-21 | S-01 | Area 2 | Selected Area 1

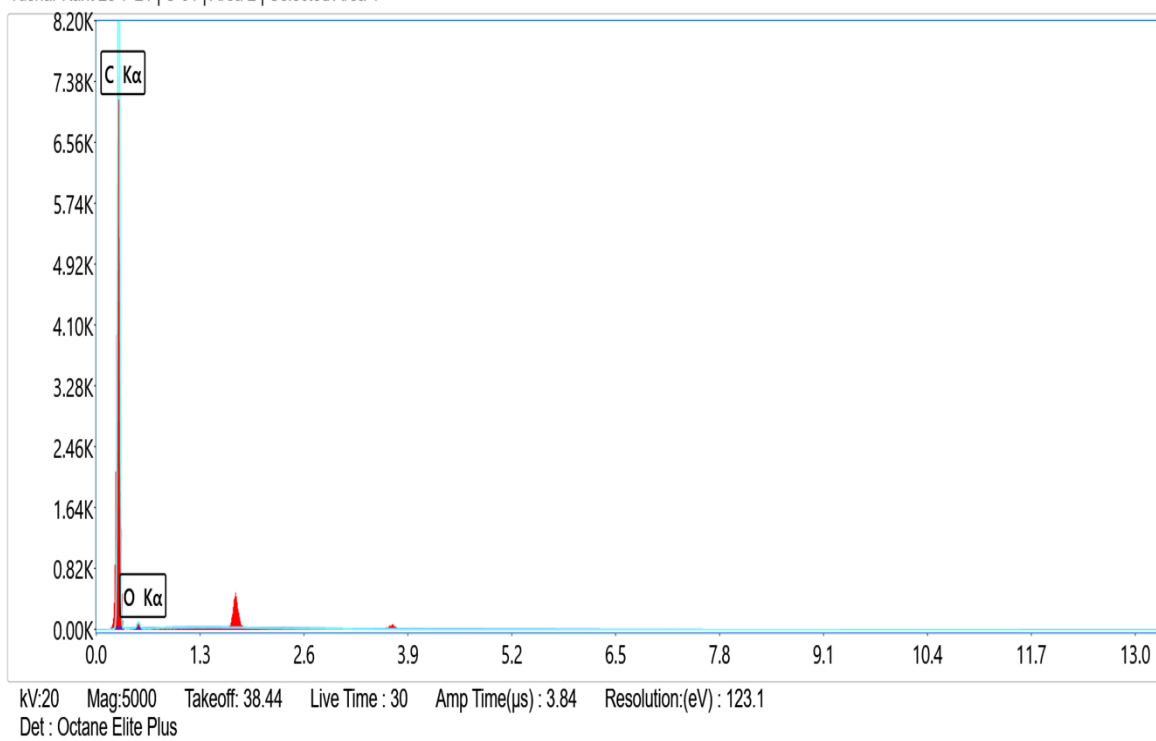

**Fig. S2.** EDS spectrum of the graphene ethyl cellulose.

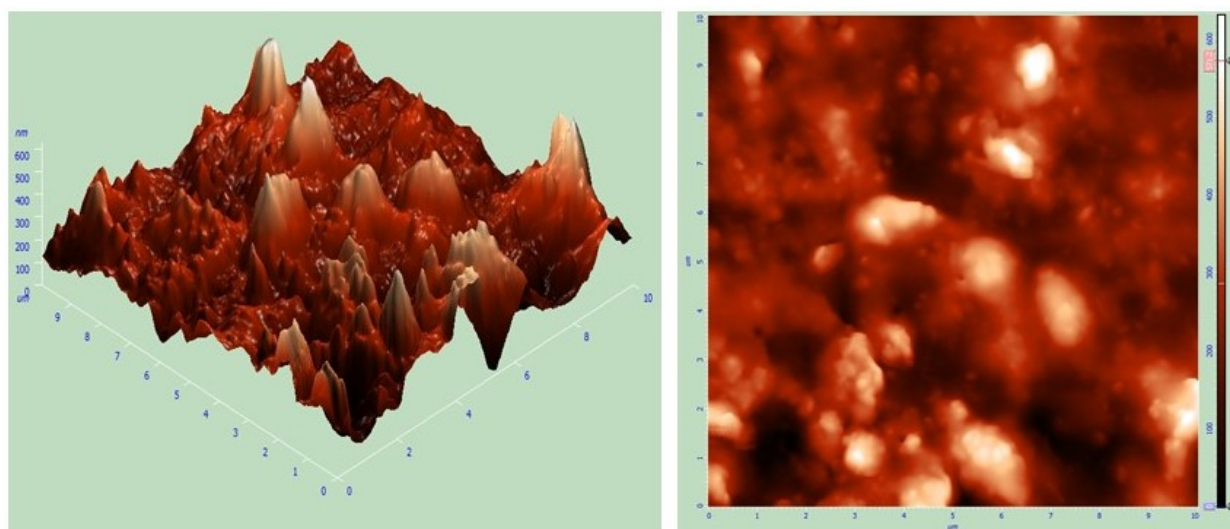

**Fig. S3.** AFM data of Gr-EC nano ink.

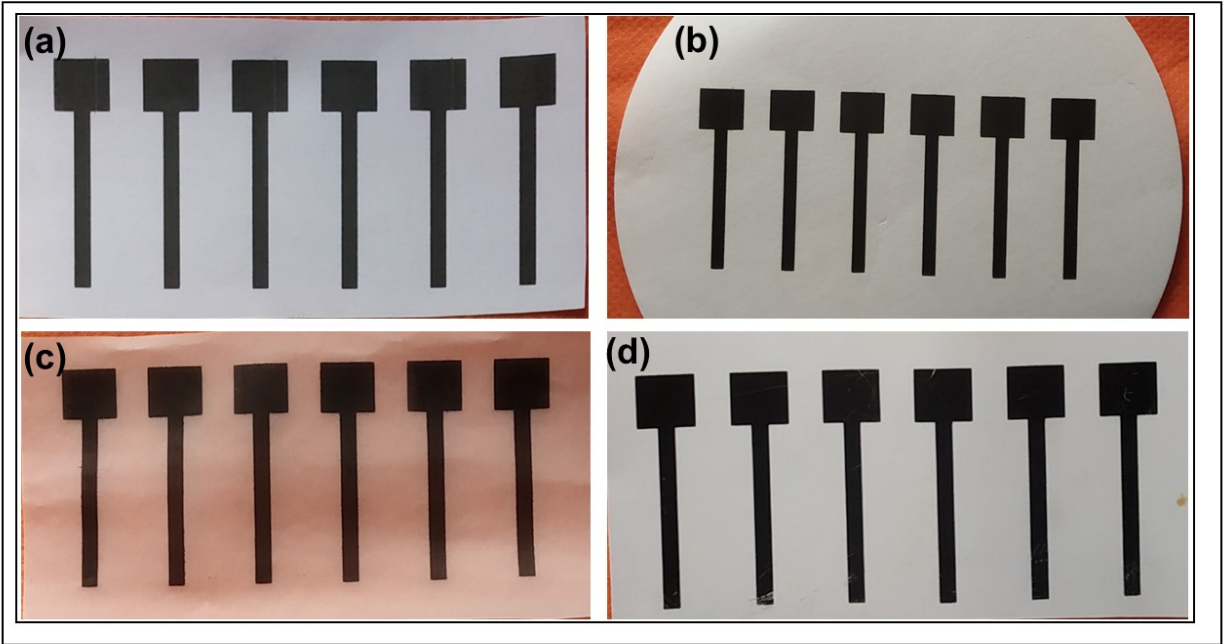

**Fig. S4.** Deposition of graphene ethyl cellulose nano-ink on paper substrates (a) digital photo paper, (b) Whatman filter paper No. 1, (c) butter paper and (d) bond paper.

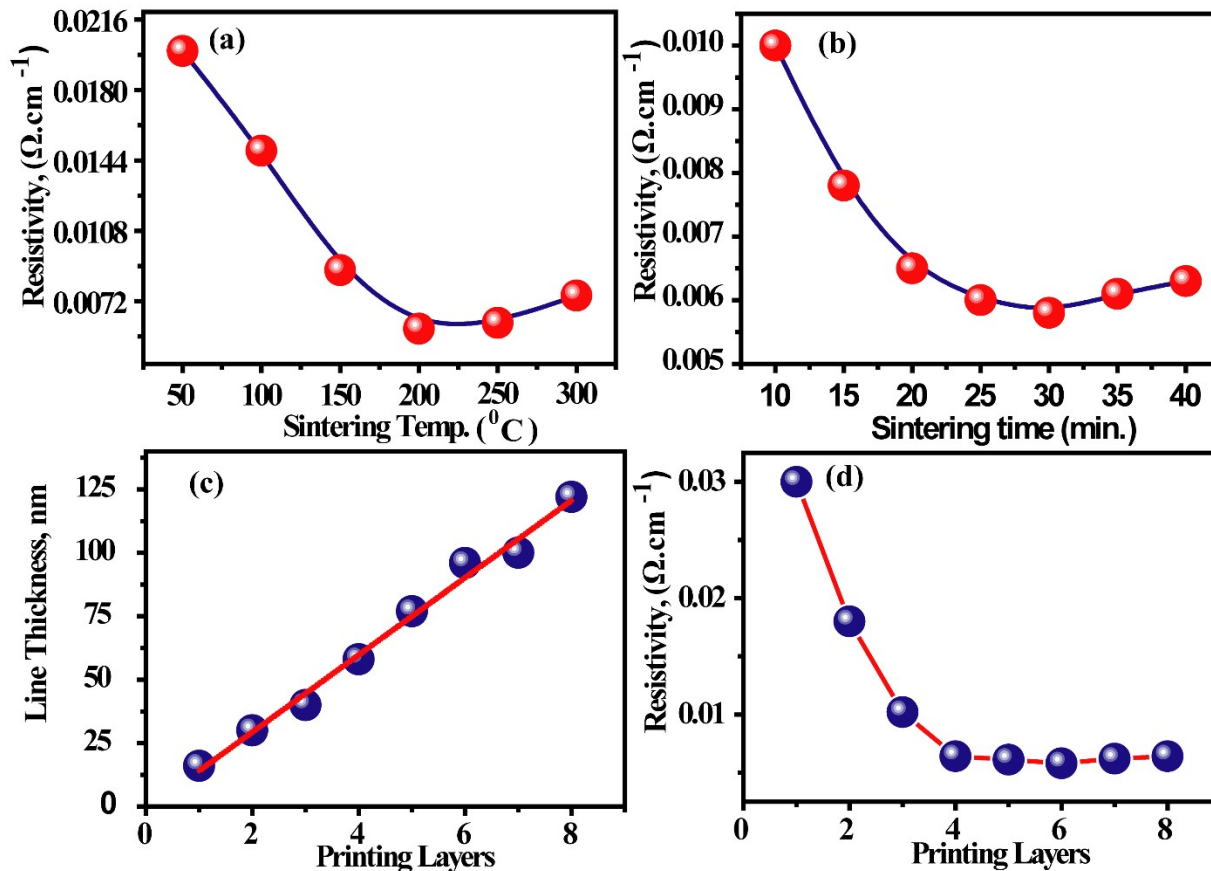

**Fig. S5.** Electrical characterization of graphene printed layers. (a) Electrical resistivity of paper films plotted against the sintering temperature for a fixed sintering time of 30 min that shows polymer decomposition at 200  $^{\circ}\text{C}$  and increases their resistivity due to graphene oxidation above 300  $^{\circ}\text{C}$ . (b) Dependence of electrical resistivity on the annealing time for a fixed annealing temperature of 200  $^{\circ}\text{C}$ , showing that low resistivity is achieved following annealing for 30 min. (c) Thickness of inkjet-printed graphene lines on photo paper substrate for increasing number of printing layers and (d) Electrical resistivity of printed layer for increasing numbers of printing passes, showing comparatively better result of sixth printing layers.

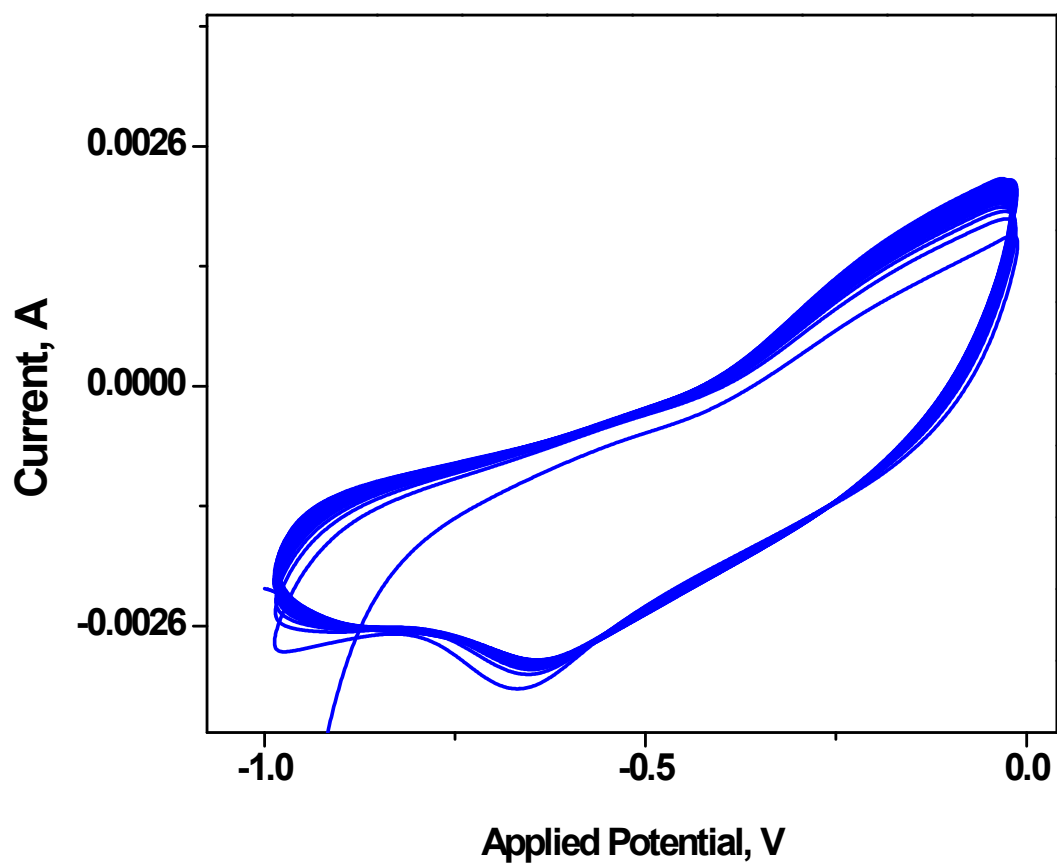

**Fig. S6.** 30 cycles of CV measurements of 25 mM  $\text{H}_2\text{O}_2$  when graphene ethyl cellulose was used as a working electrode in the presence of 0.2 M PBS (pH 7.0) and 0.4 M KCl at 0.1 V/s scan rate.

**Table S1.** Effect of sintering temperature and sintering time on the resistivity of graphene ethyl cellulose /PPE

| Sintering Temp.<br>°C | Resistivity<br>( $\Omega$ .cm) | Sintering<br>Time, min | Resistivity<br>( $\Omega$ .cm) |
|-----------------------|--------------------------------|------------------------|--------------------------------|
| 50                    | 0.02                           | 10                     | 0.01                           |
| 100                   | 0.0149                         | 15                     | 0.0078                         |
| 150                   | 0.0088                         | 20                     | 0.0065                         |
| 200                   | 0.0058                         | 25                     | 0.006                          |
| 250                   | 0.0061                         | 30                     | 0.0058                         |
| 300                   | 0.0075                         | 35                     | 0.0061                         |



**Table S2.** Effect of printing layers with varying sintering temperature sintering time on resistivity of graphene ethyl cellulose /PPE

| Printing Layers | Layer Thickness (nm) | Printing Layers | Resistivity ( $\Omega$ .cm) |
|-----------------|----------------------|-----------------|-----------------------------|
| 1               | 16                   | 1               | 0.03                        |
| 2               | 30                   | 2               | 0.018                       |
| 3               | 40                   | 3               | 0.0102                      |
| 4               | 58                   | 4               | 0.0064                      |
| 5               | 77                   | 5               | 0.0061                      |
| 6               | 96                   | 6               | 0.0058                      |
| 7               | 100                  | 7               | 0.0062                      |
| 8               | 101                  | 8               | 0.0064                      |

**Table S3.** Determination of RSD, % (precision) of reduction potential and reduction current when Gr-EC/PPE used as a working electrode for 30 cycle scanning with 25 mM H<sub>2</sub>O<sub>2</sub>.

| S. No. | Reduction Potential (V) | Reduction Current (A) |
|--------|-------------------------|-----------------------|
| 1.     | -0.679                  | -0.0030374            |
| 2.     | -0.645                  | -0.003143             |
| 3.     | -0.647                  | -0.0030556            |
| 4.     | -0.649                  | -0.00307157           |
| 5.     | -0.651                  | -0.00305549           |
| 6.     | -0.653                  | -0.00304243           |
| 7.     | -0.655                  | -0.00303383           |
| 8.     | -0.657                  | -0.00301517           |
| 9.     | -0.659                  | -0.00300192           |
| 10.    | -0.661                  | -0.00298906           |
| 11.    | -0.663                  | -0.00297218           |
| 12.    | -0.665                  | -0.00295101           |
| 13.    | -0.667                  | -0.00295831           |
| 14.    | -0.634                  | -0.00299454           |
| 15.    | -0.636                  | -0.00300101           |
| 16.    | -0.638                  | -0.00299514           |
| 17.    | -0.664                  | -0.00299372           |
| 18.    | -0.642                  | -0.00299253           |
| 19.    | -0.644                  | -0.00299004           |
| 20.    | -0.646                  | -0.00299123           |

|       |          |              |
|-------|----------|--------------|
| 21.   | -0.648   | -0.00299317  |
| 22.   | -0.650   | -0.00298865  |
| 23.   | -0.652   | -0.00298662  |
| 24.   | -0.654   | -0.00299826  |
| 25.   | -0.656   | -0.00300293  |
| 26.   | -0.658   | -0.003002    |
| 27.   | -0.661   | -0.00300002  |
| 28.   | -0.662   | -0.00299334  |
| 29.   | -0.628   | -0.00300114  |
| 30.   | -0.666   | -0.00298498  |
| SD    | 0.010973 | 3.67228E- 05 |
| Mean  | -0.653   | -0.00300788  |
| RSD % | ± 1.68   | ± 1.22       |

---

**Table S4.** Determination of stability of Gr-EC/PPE when Gr-EC/PPE used as a working electrode for 30 days with 25 mM H<sub>2</sub>O<sub>2</sub>.

| Number of Days | Reduction Potential (V) | Reduction Current (A) |
|----------------|-------------------------|-----------------------|
| 1.             | -0.628                  | -0.00300114           |
| 2.             | -0.634                  | -0.00299454           |
| 3.             | -0.636                  | -0.00300101           |
| 4.             | -0.638                  | -0.00299514           |
| 5.             | -0.642                  | -0.00299253           |
| 6.             | -0.644                  | -0.00299004           |
| 7.             | -0.645                  | -0.003143             |
| 8.             | -0.646                  | -0.00299123           |
| 9.             | -0.647                  | -0.0030556            |
| 10.            | -0.648                  | -0.00299317           |
| 11.            | -0.649                  | -0.00307157           |
| 12.            | -0.65                   | -0.00298865           |
| 13.            | -0.651                  | -0.00305549           |
| 14.            | -0.652                  | -0.00298662           |
| 15.            | -0.653                  | -0.00304243           |
| 16.            | -0.654                  | -0.00299826           |
| 17.            | -0.655                  | -0.00303383           |
| 18.            | -0.656                  | -0.00300293           |
| 19.            | -0.657                  | -0.00301517           |
| 20.            | -0.658                  | -0.003002             |
| 21.            | -0.659                  | -0.00300192           |
| 22.            | -0.661                  | -0.00298906           |
| 23.            | -0.661                  | -0.00300002           |
| 24.            | -0.662                  | -0.00299334           |
| 25.            | -0.663                  | -0.00297218           |
| 26.            | -0.664                  | -0.00299372           |
| 27.            | -0.665                  | -0.00295101           |

|     |        |             |
|-----|--------|-------------|
| 28. | -0.666 | -0.00298498 |
| 29. | -0.667 | -0.00295831 |
| 30. | -0.679 | -0.0030374  |

---

**Table S5.** Calculation of recovery % of hydrogen peroxide in wastewater sample when graphene ethyl cellulose /PPE used as working electrode in optimized condition.

| Amount of H <sub>2</sub> O <sub>2</sub> added (μM) | Amount of H <sub>2</sub> O <sub>2</sub> found (μM) | Recovery % |
|----------------------------------------------------|----------------------------------------------------|------------|
| 20                                                 | 19.5                                               | 97.5       |
| 50                                                 | 47.5                                               | 95.0       |
| 100                                                | 94.8                                               | 94.8       |
